# Supplementary material
Source: Springer Nature journal article supplement (https://www.springermedizin.de/resource/supplementary/13054_2012_607_MOESM1_ESM.pdf/9708850)
Supplement: MOESM1 [file 9708850]

**Critically ill Patients**  
**n = 923**

**Critically ill Patients**  
**With Acute Kidney Injury**  
**Continuous Renal Replacement Therapy**  
**n = 233**  
**(25.24%)**

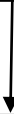

**INCLUSION**  
**n=233**

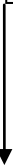

**Death within 36 h**  
**after Admission**  
**n=25**

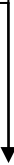

**Survival for at least 36 h**  
**After Admission**  
**n=208**

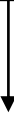

**28-day Survival**  
**n=117**  
**(56.25%)**

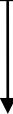

**28-day Mortality**  
**n=91**  
**(43.75%)**
